# Supplementary material for: Effects of Cosmetic Emulsions on the Surface Properties of Mongolian Hair
Source: PubMed Central journal article supplement — ACS Omega. 2022 Mar 24;7(13):10910–20. doi: 10.1021/acsomega.1c06526 (PMC8991896; doi:10.1021/acsomega.1c06526), 2022-03-24
Supplement: ao1c06526_si_001.pdf [file ao1c06526_si_001.pdf]

# Supporting Information

## Effects of Cosmetic Emulsions on the Surface Properties of Mongolian Hair

*Zhaoting Liu,<sup>1\*</sup> Katja Graf,<sup>2</sup> Jochen Hub,<sup>2</sup> & Matthias Kellermeier<sup>2\*</sup>*

<sup>1</sup> BASF Advanced Chemicals Co., Ltd, Care Chemicals Asia Pacific, 300 Jiang Xin Sha Road,  
200137 Shanghai, China; E-Mail: tina.liu@basf.com

<sup>2</sup> BASF SE, Material Physics, RAA/OS – B007, Carl-Bosch-Strasse 38, D-67056 Ludwigshafen  
am Rhein, Germany; E-Mail: matthias.kellermeier@basf.com

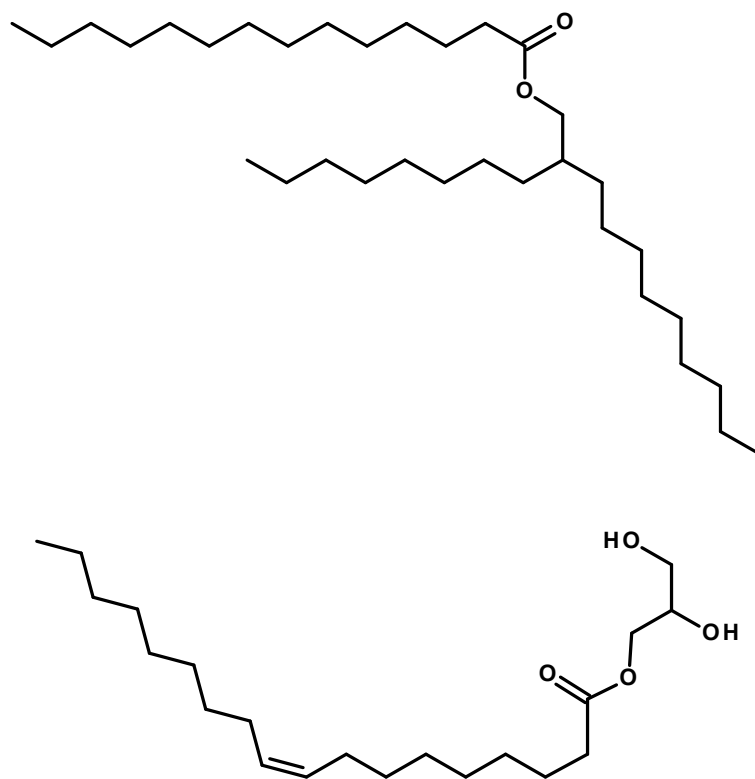

**Figure S1:** Chemical structures of Eutanol GM (octyldodecyl myristate, top) and Monomuls 90-O18 (glyceryl oleate, bottom).

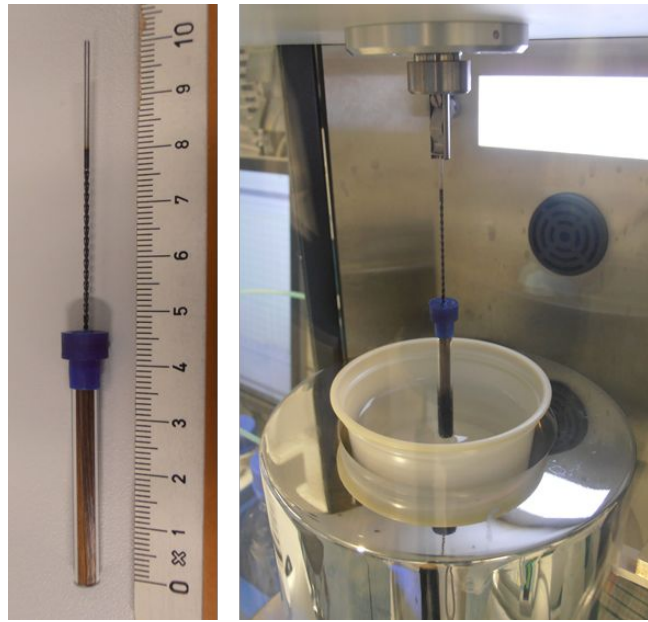

**Figure S2:** Experimental setup used for investigating the wetting behavior of bleached Chinese hair by means of the Washburn sorption technique. Left: Glass column filled with hair fibers; right: column suspended on force tensiometer with a reservoir containing the test liquid below. Photograph courtesy of Elisabeth Wagner, Copyright 2021.

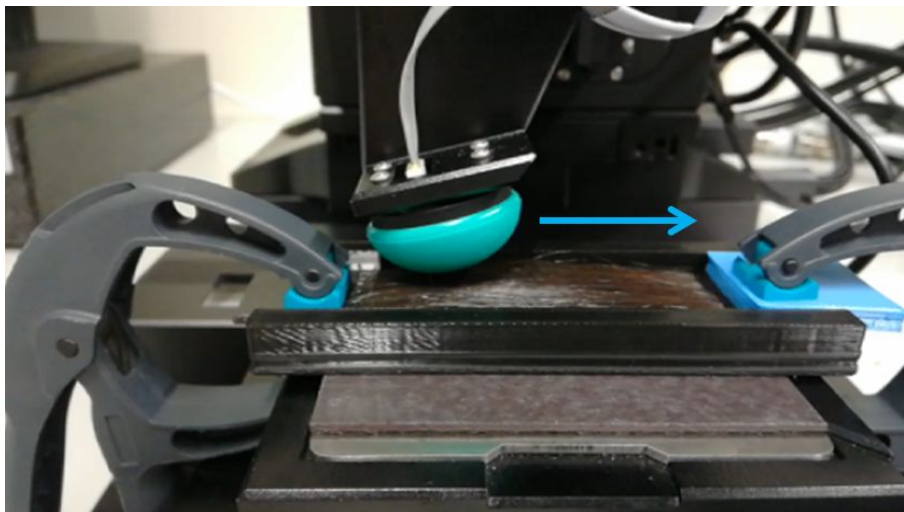

**Figure S3:** Experimental setup used for haptic characterization of hair strands by means of the Syntouch Toccare instrument. The arrow indicates the movement of the biomimetic finger over the cuticles on the hair surfaces along the growth direction.

| Element       | Species           | Binding energy [eV] | Virgin     | Bleached   |
|---------------|-------------------|---------------------|------------|------------|
| Carbon (1s)   | All               |                     | 72.2 ± 1.3 | 66.1 ± 1.7 |
|               | C-C, C-H          | 284.4               | 41.5       | 29.8       |
|               | C-O               | 286.2               | 13.3       | 14.6       |
|               | C-N               |                     | 6.3        | 10.1       |
|               | COOR, Amide       | 287.2               | 9.3        | 8.7        |
|               | Carbonate         | 288.9               | 1.8        | 2.8        |
| Oxygen (1s)   | All               |                     | 14.8 ± 1.5 | 20.3 ± 1.0 |
| Nitrogen (1s) | All               |                     | 8.6 ± 0.7  | 9.4 ± 1.2  |
|               | Amide             | 399.8               | 7.1        | 5.6        |
|               | Ammonium          | 401.9               | 0.8        | 2.1        |
|               | Imide             | 400.8               | 0.3        | 0.3        |
| Sulfur (2p)   | All               |                     | 2.0 ± 0.3  | 1.7 ± 0.3  |
|               | C-S-C, Dithiol    | 163.5               | 1.5        | 0.6        |
|               | R-SO <sub>x</sub> | 165.6-169.4         | 0.5        | 1.2        |
| Calcium (2p)  | All               |                     | 0.6 ± 0.1  | 0.9 ± 0.1  |
| Silicon (2p)  | All               |                     | 1.7 ± 0.1  | 1.6 ± 0.2  |

**Table S1:** Results of XPS analyses on virgin and bleached Chinese hair (values in at%). For each detected element, the total concentration at the surface (denoted as “All”) as well as its distribution into different chemical species (for C, N and S) are given. Fractions for the species were obtained by fitting the signal of each element with multiple components corresponding to the respective binding state, for which the listed binding energies were assumed (note that R-SO<sub>x</sub> comprises R-SO, R-SO<sub>3</sub> and R-SO<sub>4</sub>).

| Parameter                | Abbreviation | Origin                                                                                                                                          | Perception                     |
|--------------------------|--------------|-------------------------------------------------------------------------------------------------------------------------------------------------|--------------------------------|
| Macrottexture            | mTX          | Intensity of low-frequency tactile vibrations arising from large-scale features (> 1 mm) when sliding                                           | from “smooth” to “textured”.   |
| Macrottexture coarseness | mCO          | Spacing derived by vibrations from large-scale features (> 1 mm)                                                                                | from “fine” to “coarse”        |
| Macrottexture regularity | mRG          | Uniformity of large-scale features (> 1 mm), reflecting the degree to which macrottexture features repeat periodically                          | from “random” to “regular”     |
| Microtexture roughness   | uRO          | Intensity of high-frequency tactile vibrations arising from small-scale features (< 1 mm)                                                       | from “smooth” to “rough”       |
| Microtexture coarseness  | uCO          | Spacing derived by vibrations from small-scale features (< 1 mm)                                                                                | from “fine” to “coarse”        |
| Tactile stiction         | fST          | Effort required to initiate sliding as derived from the force to start motion over the surface                                                  | from “low grip” to “high grip” |
| Sliding resistance       | fRS          | Effort required to continue sliding over a surface after it has been initiated, as derived from the force needed to maintain the given velocity | from “slippery” to “resistive” |

**Table S2:** Description of the haptic parameters determined in this work.

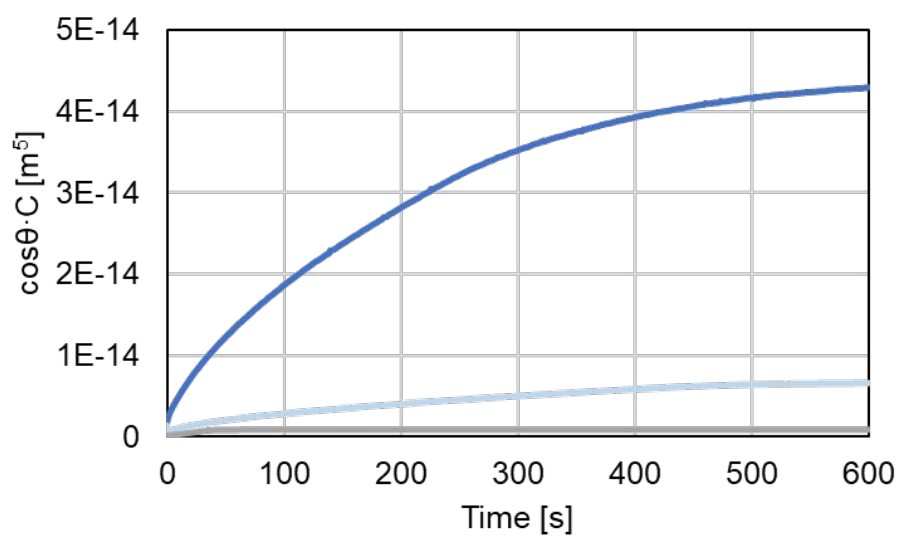

**Figure S4:** Characterization of the wettability of bleached Chinese hair using the Washburn technique (cf. Figure S1), yielding time-dependent sorption profiles for water (grey), octyldodecyl myristate (light-blue) and dimethicone (dark-blue). Values on the y-axis represent the rate of sorption after correction for differences in the physical properties of the used liquids (i.e.  $\cos\theta \cdot C = (m^2/t) \cdot \eta / (\gamma \cdot \rho^2)$ , cf. Equation 1 in the main text).
